# Supplementary material
Source: PubMed Central journal article supplement (PMC7658820)
Supplement: 20-00450.pdf [file 20-00450.pdf]

**On-line Table 1: Patient clinical characteristics in 7 cases of DL-GNT**

| Case/Demographics                    | Clinical Presentation                  | Spinal Cord                |                          |                        | Brain                      |                          |                | Genetic Examination |                                                                          |
|--------------------------------------|----------------------------------------|----------------------------|--------------------------|------------------------|----------------------------|--------------------------|----------------|---------------------|--------------------------------------------------------------------------|
|                                      |                                        | Lepto-meningeal Thickening | Cystic-appearing Lesions | Solid Parenchymal Mass | Lepto-meningeal Thickening | Cystic-appearing Lesions | Hydro-cephalus |                     | Distribution of Leptomeningeal Spread (supra- and infratentorial)        |
| Case 1 (14-year-old male adolescent) | Chronic headache                       | Present                    | Absent                   | Absent                 | Present                    | Absent                   | Present        | Both                | Ip Deletion/KIAA1549-Codeletion/BRAF Fusion/Total Examinations Performed |
| Case 2 (4-year-old boy)              | Chronic headache                       | Absent                     | Absent                   | Present                | Absent                     | Present                  | Present        | Absent              | Absent/Absent/Absent                                                     |
| Case 3 (10-year-old boy)             | New onset seizure                      | Absent                     | Absent                   | Absent                 | Present                    | Absent                   | Present        | Infratentorial      | Absent/Absent/Absent                                                     |
| Case 4 (8-year-old boy)              | Chronic headache                       | Present                    | Present                  | Absent                 | Present                    | Present                  | Absent         | Both                | Absent/Absent/Absent                                                     |
| Case 5 (3.5-year-old boy)            | Chronic headache                       | Present                    | Present                  | Absent                 | Present                    | Present                  | Absent         | Both                | Absent/Absent/Absent                                                     |
| Case 6 (5-year-old boy)              | Gait imbalance                         | Present                    | Absent                   | Present                | Absent                     | Absent                   | Present        | Absent              | Present/Present/Present                                                  |
| Case 7 (3-year-old boy)              | New onset gaze abnormality and seizure | Present                    | Absent                   | Absent                 | Present                    | Absent                   | Present        | Both                | Present/Absent/Present                                                   |

**On-line Table 2: Comprehensive review of MR imaging characteristics of all DL-GNT cases published in the last 20 years**

| Study                           | n         | Demographics                               | Imaging Characteristics    |                          |                        |                            |                          |                    |                                                                                                          | Genetic Examination |
|---------------------------------|-----------|--------------------------------------------|----------------------------|--------------------------|------------------------|----------------------------|--------------------------|--------------------|----------------------------------------------------------------------------------------------------------|---------------------|
|                                 |           |                                            | Spinal Cord                |                          |                        | Brain                      |                          |                    |                                                                                                          |                     |
|                                 |           |                                            | Lepto-meningeal Thickening | Cystic-appearing Lesions | Solid parenchymal Mass | Lepto-meningeal Thickening | Cystic-appearing Lesions | Hydro-cephalus     | Distribution of Leptomeningeal Sprea (Supratentorial/ Infratentorial/Both (su- pra- and infratentorial)) |                     |
| Rodriguez et al <sup>8</sup>    | 36        | 24 male/12 female (median age = 5 years)   | 18/36                      | 8/36                     | 7/36                   | 25/36                      | 10/36                    | 8/36               | 5/4/16                                                                                                   | 8/3/0/15            |
| Deng et al <sup>11</sup>        | 15*       | 9 male/6 female (median age = 5 years)     | 7/15                       | 14/15                    | 0/15                   | 7/15                       | 5/15                     | 0/15               | 0/0/7                                                                                                    | 10/5/0/15           |
| Schniederjan et al <sup>2</sup> | 9         | 4 male/5 female (median age = 4 years)     | 9/9                        | 0/9                      | 2/9                    | 9/9                        | 6/9                      | 7/9                | 0/0/9                                                                                                    | 0/9/0/9             |
| Aguilera et al <sup>3</sup>     | 7         | 4 male/3 female (median age = 3 years)     | 7/7                        | 7/7                      | 0/7                    | 6/7                        | 6/7                      | 0/7                | 0/0/6                                                                                                    | 0/0/0/7             |
| Chiang et al <sup>5</sup>       | 5         | 3 male/2 female (median age = 13 years)    | 0/5                        | 0/5                      | 5/5                    | 0/5                        | 0/5                      | 0/5                | 0/0/0                                                                                                    | 4/0/4/4             |
| Gardiman et al <sup>4</sup>     | 4         | 2 male/2 female (median age = 3 years)     | 3/4                        | 3/4                      | 1/4                    | 4/4                        | 4/4                      | 3/4                | 0/0/4                                                                                                    | 1/0/0/4             |
| Preuss et al <sup>14</sup>      | 4         | 4 male/0 female (median age = 3 years)     | 4/4                        | 4/4                      | 0/4                    | 4/4                        | 4/4                      | 4/4                | 0/0/4                                                                                                    | 0/0/0/4             |
| Cho et al <sup>15</sup>         | 3         | 3 male/0 female (median age = 22 years)    | 1/3                        | 0/3                      | 0/3                    | 3/3                        | 0/3                      | 0/3                | 0/2/1                                                                                                    | 0/0/0/0             |
| Schwetye et al <sup>6</sup>     | 2         | 2 male/0 female (median age = 8 years)     | 2/2                        | 0/2                      | 0/2                    | 2/2                        | 0/2                      | 2/2                | 0/1/1                                                                                                    | 1/0/0/2             |
| Pellerino et al <sup>7</sup>    | 1         | 31-year-old man                            | 1/1                        | 1/1                      | 0/1                    | 1/1                        | 1/1                      | 1/1                | 0/0/1                                                                                                    | 0/0/0/1             |
| Lyle et al <sup>6</sup>         | 1         | 14-year-old female adolescent              | 1/1                        | 1/1                      | 1/1                    | 1/1                        | 1/1                      | 1/1                | 0/0/1                                                                                                    | 0/0/0/1             |
| Karlowee et al <sup>2</sup>     | 1         | 17-year-old male                           | 1/1                        | 0/1                      | 1/1                    | 1/1                        | 0/1                      | 1/1                | 0/0/1                                                                                                    | 1/0/0/1             |
| Yamasaki et al <sup>17</sup>    | 1         | 22-year-old man                            | 1/1                        | 0/1                      | 0/1                    | 1/1                        | 0/1                      | 0/1                | 0/1/0                                                                                                    | 0/0/0/1             |
| Fiaschi et al <sup>18</sup>     | 1         | 36-year-old woman                          | 0/1                        | 0/1                      | 0/1                    | 1/1                        | 1/1                      | 0/1                | 0/1/0                                                                                                    | 0/0/0/1             |
| Tiwari et al <sup>9</sup>       | 1         | 3-year-old girl                            | 1/1                        | 1/1                      | 1/1                    | 1/1                        | 1/1                      | 0/1                | 0/1/0                                                                                                    | 0/0/0/0             |
| <b>Total</b>                    | <b>91</b> | <b>56/91 (62%) 39/91 (43%) 18/91 (20%)</b> | <b>39/91 (62%)</b>         | <b>39/91 (43%)</b>       | <b>18/91 (20%)</b>     | <b>66/91 (73%)</b>         | <b>39/91 (43%)</b>       | <b>26/91 (29%)</b> | <b>5/10/51</b>                                                                                           | <b>25/17/4/65</b>   |

\* Comprehensive imaging description was available for only 15 of 30 patients with DL-GNT.
